# Supplementary material for: Cadmium-coordinated supramolecule suppresses tumor growth of T-cell leukemia in mice
Source: PubMed Central journal article supplement — Cancer Sci. 2015 Apr 6;106(5):635–41. doi: 10.1111/cas.12651 (PMC4452166; doi:10.1111/cas.12651), 2015-04-06
Supplement: cas0106-0635-sd1.pdf [file cas0106-0635-sd1.pdf]

## Supporting figures

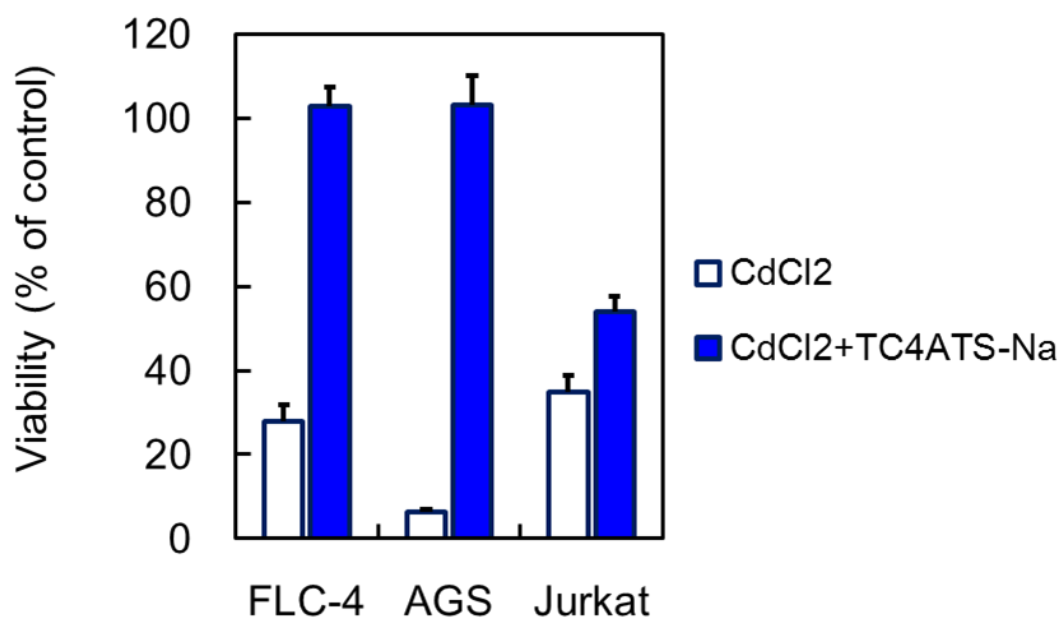

Fig. S1 Neutralizing effect of TC4ATS-Na against cadmium toxicity.

FLC-4, AGS, and Jurkat cells were treated with CdCl<sub>2</sub> (200  $\mu$ M for FLC4 and AGS, 2  $\mu$ M for Jurkat cells) alone or in combination with TC4ATS-Na (500  $\mu$ M for FLC4 and AGS, 5  $\mu$ M for Jurkat cells) for 48 h. Cell viabilities were analyzed using MTT assay to determine the cytotoxicity of tested agents. Data are presented as means  $\pm$  SD (n = 3).

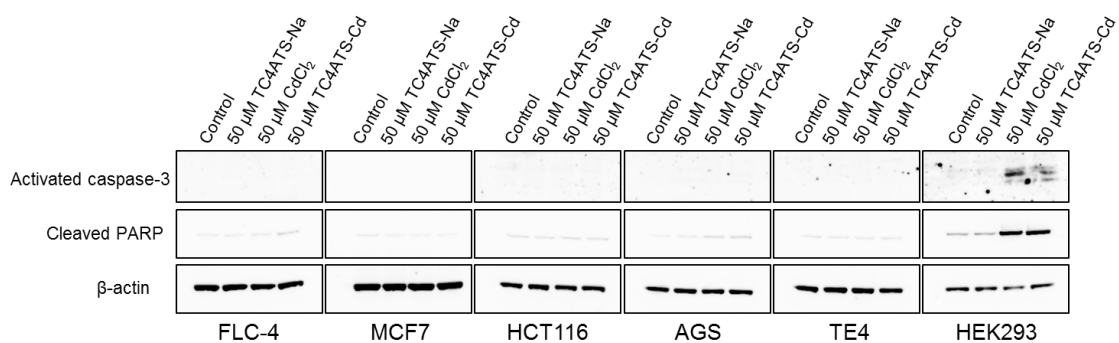

Fig. S2 Western blot analysis of activated caspase-3 and cleaved PARP in epithelia-derived cell lines.

Epithelia-derived cell lines were cultured with TC4ATS-Na, CdCl<sub>2</sub>, or TC4ATS-Cd at 50 μM for 24 h. After treatment, cells were lysed. Cell lysates were clarified by centrifugation. After determination of protein concentration, equal amounts of protein were subjected to SDS-PAGE under reducing conditions. After electrophoresis, proteins were transferred to PVDF membranes. Membranes were blocked and then incubated with antibodies specific for activated caspase-3, cleaved PARP, or β-actin. After washing, the membranes were incubated with peroxidase-conjugated secondary antibody. Subsequently, targeted proteins were detected using ECL system.

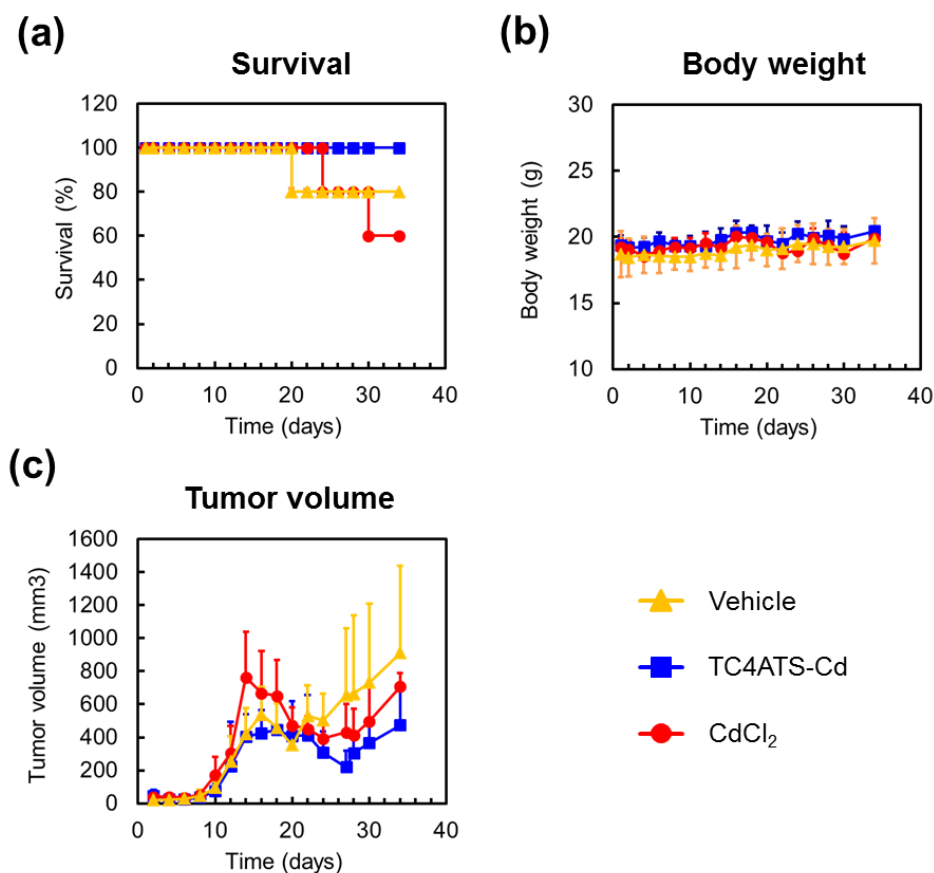

Fig. S3 TC4ATS-Cd elicits no adverse effects on tumor-bearing mice.

Jurkat cells were inoculated subcutaneously into SCID mice. Twenty days after inoculation, saline vehicle, TC4ATS-Cd (13  $\mu\text{mol/kg}$ ), or CdCl<sub>2</sub> (13  $\mu\text{mol/kg}$ ) were administered by i.p. injections 3 times weekly for 2 weeks. Body weights and tumor sizes were measured 3 times weekly. (a) Survival curves. (b) Body weights. (c) Tumor volumes. Tumor volumes were calculated as follows: Tumor volume = (Long length)  $\times$  (Short length)<sup>2</sup>  $\times$  1/2. Data are presented as means  $\pm$  SD (n = 3-5).

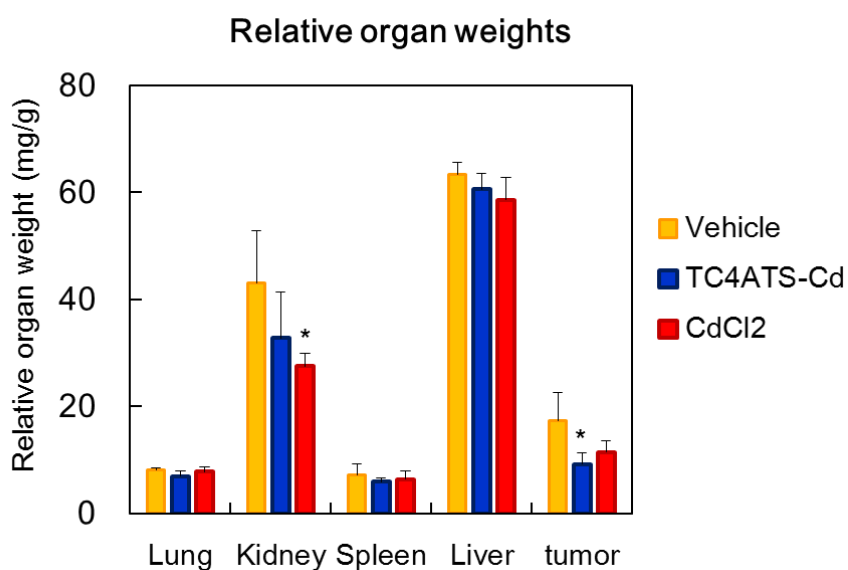

Fig. S4 Relative organ weights in tumor-bearing mice.

Jurkat cells were inoculated subcutaneously into SCID mice. Twenty days after inoculation, saline vehicle, TC4ATS-Cd (13  $\mu\text{mol/kg}$ ), or CdCl<sub>2</sub> (13  $\mu\text{mol/kg}$ ) were administered by i.p. injections 3 times weekly for 2 weeks. Thirty-five days after inoculation, mice were euthanized and tumors and organs were excised and weighed. Relative organ weights were calculated as follows: Relative organ weights = [Organ weight (mg)] / [Body weight (g)]. Data are presented as means  $\pm$  SD (n = 3-5). \*  $P < 0.05$ , versus vehicle.
